# Supplementary material for: Simultaneous Quantification of Amino Metabolites in Multiple Metabolic Pathways Using Ultra-High Performance Liquid Chromatography with Tandem-mass Spectrometry
Source: PubMed Central journal article supplement (PMC5431165; doi:10.1038/s41598-017-01435-7), 2017-05-03
Supplement: 41598_2017_1435_MOESM1_ESM.pdf [file 41598_2017_1435_MOESM1_ESM.pdf]

SUPPORTING INFORMATION

**Simultaneous Quantification of Amino Metabolites in Multiple Metabolic Pathways Using  
Ultra-High Performance Liquid Chromatography with Tandem-mass Spectrometry**

Jin Wang<sup>†‡||</sup>, Lihong Zhou<sup>†||</sup>, Hehua Lei<sup>||</sup>, Fuhua Hao<sup>||</sup>, Xin Liu<sup>†</sup>, Yulan Wang<sup>||§</sup>, and Huiru Tang<sup>‡\*</sup>

<sup>†</sup>*School of Life Science and Technology, Huazhong University of Science and Technology, Wuhan, 430074,*

*China* <sup>‡</sup>*State Key Laboratory of Genetic Engineering, Zhongshan Hospital and School of Life Sciences,*

*Fudan University, Shanghai International Centre for Molecular Phenomics, Collaborative Innovation*

*Center for Genetics and Development, Shanghai 200438, China.* <sup>||</sup>*CAS Key Laboratory of Magnetic*

*Resonance in Biological Systems, State Key Laboratory of Magnetic Resonance and Atomic and Molecular*

*Physics, National Centre for Magnetic Resonance in Wuhan, Wuhan Institute of Physics and Mathematics,*

*Chinese Academy of Sciences, Wuhan, 430071, China*

<sup>§</sup>*Collaborative Innovation Center for Diagnosis and Treatment of Infectious Diseases, Zhejiang University,*

*Hangzhou, 310058, China*

Supplimentary data are available. **Figure S1.** The flowchart for 5-AIQC derivatization of amino analytes with thiol and disulfide groups in one pot. **Figure S2.** Thiol-NEM adducts showed excellent stability under acidic condition by showing no extra hydrolysis within 48h. **Figure S3.** Peak intensity for some 5-AIQC-tagged amino analytes as a function of 5-AIQC-to-analyte molar ratios. **Figure S4.** UHPLC-MS chromatogram for the 5-AIQC adducts of amino analytes showing twin peaks. (A): DL-2,6-diaminopimelic acid; (B) DL-lanthionine; (C): L-glutathione (reduced form); (D):  $\gamma$ -Glu-Cys and (E): DL-homocysteine. **Figure S5** UHPLC-MS/MS chromatograms for 5-AQC-tagged 124 amino analytes. **Figure S6.** UHPLC-MS/MS chromatograms for (A) some small peptides and (B) phenylalanine metabolism and catecholamine biosynthesis. **Figure S7.** pKa measurements for 5-aminoisoquinoline and 6-aminoquinoline (1 mM water solution for both) with  $^1\text{H}$  NMR method at 298 K. **Figure S8.** Spectroscopic data for 5-AIQC. (a)  $^1\text{H}$  NMR spectrum in acetonitrile- $\text{d}_3$ ; (b) QTOF-MS spectrum in positive ion mode (in acetonitrile). **Table S1.** Solutions of mixed standards for method validation. **Table S2.** Metabolic pathways covered by this quantification method. **Table S3.** Intra- and inter-day variations (RSD %) for retention time (RT) and concentration (C) of analytes (n=5).  $\text{RT}_L$ ,  $\text{RT}_M$ ,  $\text{RT}_H$ ,  $C_L$ ,  $C_M$ ,  $C_H$  were parameters at low (L), intermediate (M) and high (H) concentration range. **Table S4,** Sensitivity enhancement by jointly using the Stream Jet ion sources and iFunnel technology (using an Agilent 6495 triple quad mass spectrometer).

**Supplementary Figure S1.** The flowchart for 5-AIQC derivatization of amino analytes with thiol and disulfide groups in one pot.

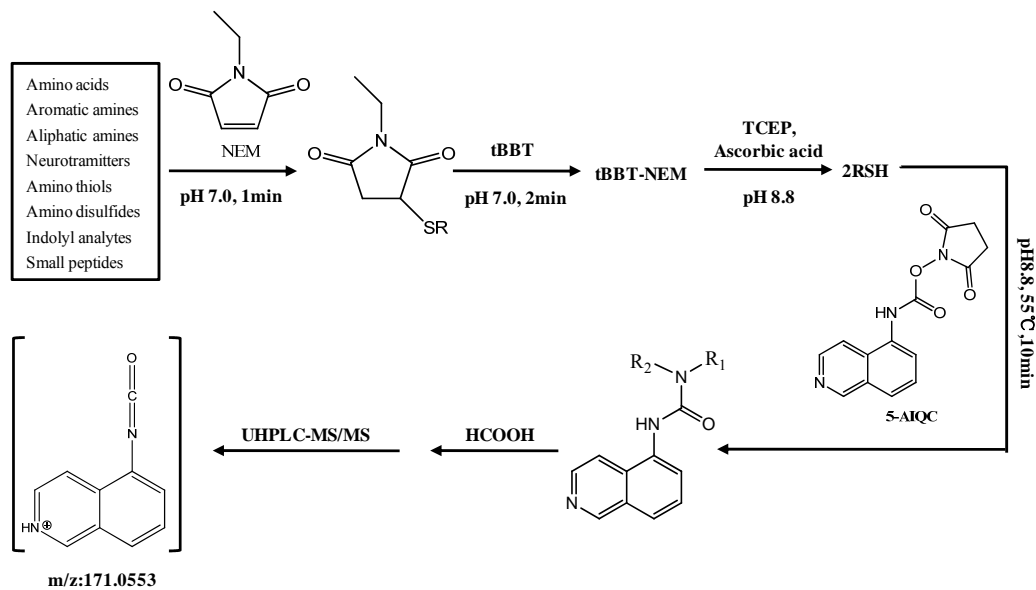

**Supplementary Figure S2.** Thiol-NEM adducts showed excellent stability under acidic condition by showing no extra hydrolysis within 48h. A<sub>1</sub>: peak area of 5-AIQC-RSH-NEM, A<sub>2</sub>: peak area of the corresponding hydrolyzed products, 5-AIQC-RSH-NEM-COOH (with ring opening in NEM). Cys: cysteine adduct; GSH: glutathione adduct.

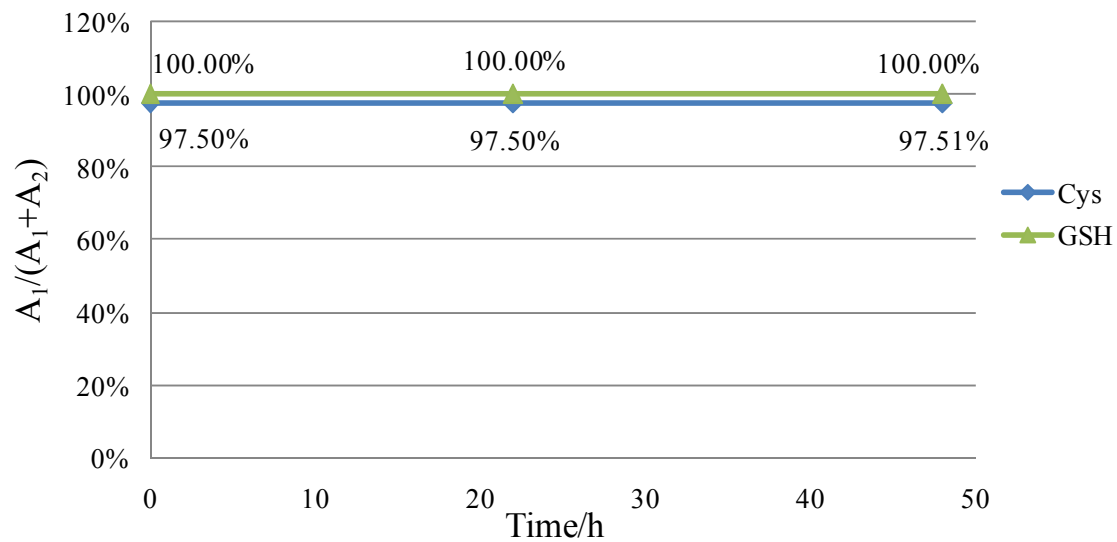

**Supplementary Figure S3.** Peak intensity for some 5-AIQC-tagged amino analytes as a function of 5-AIQC-to-analyte molar ratios.

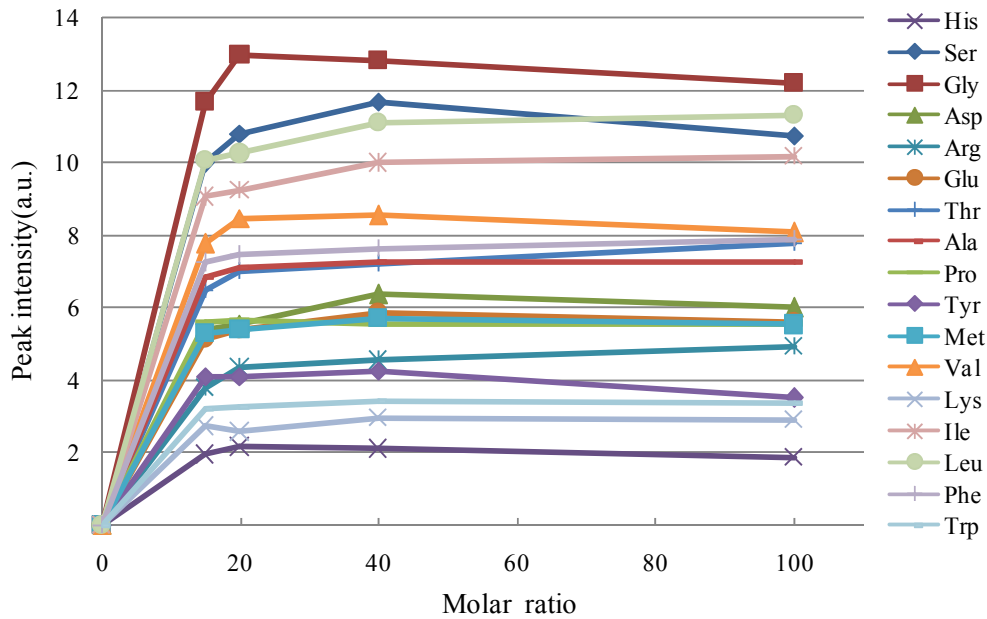

**Supplementary Figure S4.** UHPLC-MS chromatogram for the 5-AIQC adducts of amino analytes showing twin peaks. (A): DL-2,6-diaminopimelic acid; (B) DL-lanthionine; (C): L-glutathione (reduced form); (D):  $\gamma$ -Glu-Cys and (E): DL-homocysteine.

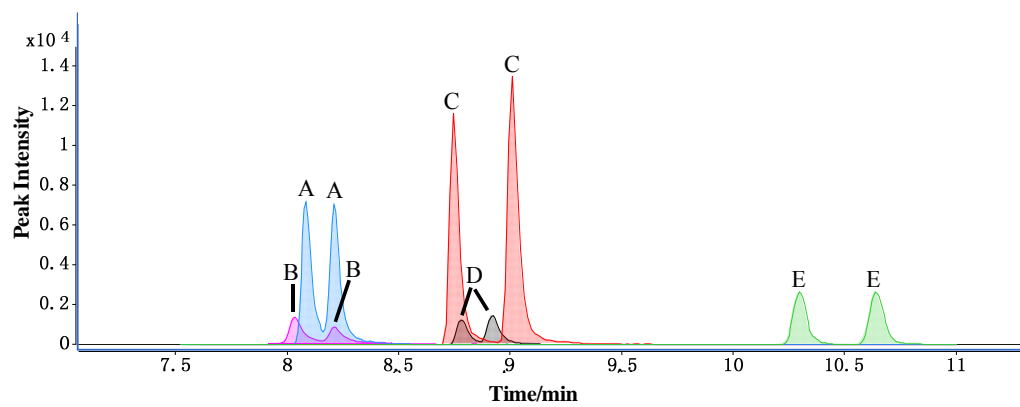

**Supplementary Figure S5.** UHPLC-MS/MS chromatograms for 5-AQC-tagged 124 amino analytes (keys in Table 1)

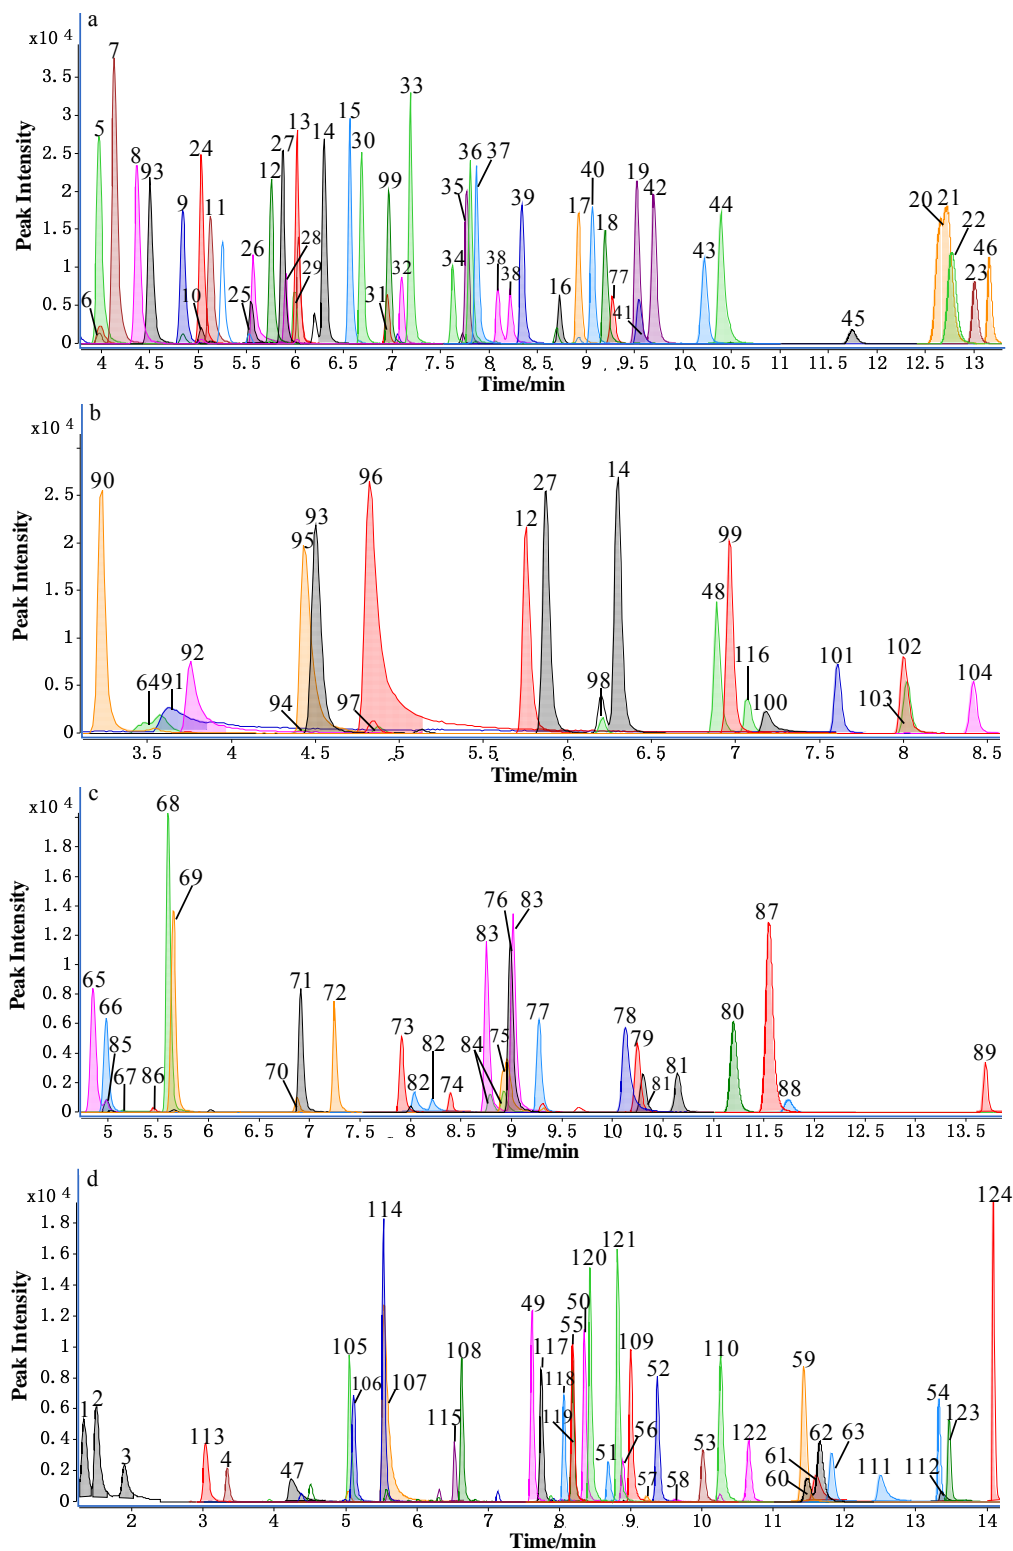

**Supplementary Figure S6.** UHPLC-MS/MS chromatograms for (A) some small peptides and (B) phenylalanine metabolism and catecholamine biosynthesis .

(A)

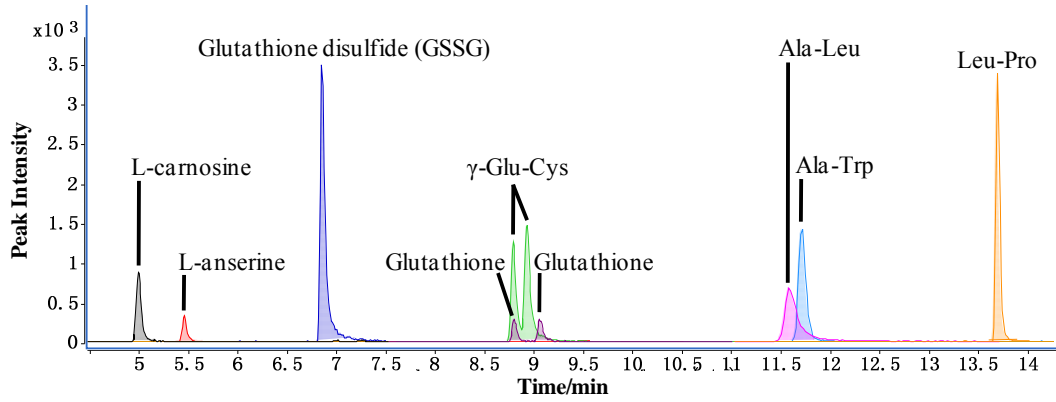

(B)

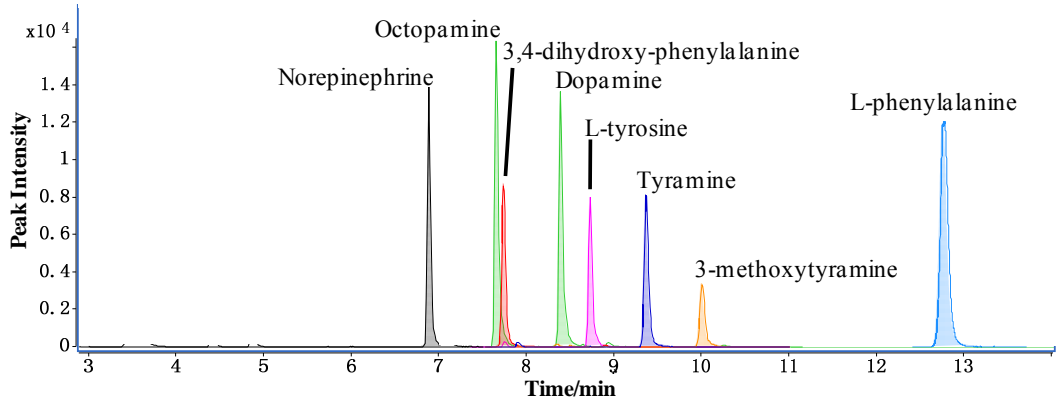



**Supplementary Figure S7.** pKa measurements for 5-aminoisoquinoline and 6-aminoquinoline (1 mM water solution for both) with  $^1\text{H}$  NMR method at 298 K. This was done on a Bruker AVANCE III 600 MHz NMR spectrometer as previously described (Xiao, C. et al. *Analyst* **2009**, *134*, 916-925). pH was adjusted using either 0.2 M HCl or 0.2 M NaOH solution to obtain the pH 2.5~12. Black squares are experimental values whereas the red lines are fitted data from the following equation:

$$\delta_{obs} = \delta_{min} + \sum_{i=0,n} \left[ \frac{\Delta_i}{1 + 10^{(pH - pK_{ai})}} \right]$$

where  $\delta_{obs}$  is the observed chemical shift at a given pH,  $\delta_{min}$  is chemical shift of a compound in the fully ionized form (when pH is about pKa+2);  $pK_{ai}$  and  $\Delta_i$  denote the apparent ionization constant and the chemical shift difference between fully ionized and unionized forms for the  $i$ th ionization process, respectively;  $n$  is the number of ionization processes in a molecule with two ionization processes considered. The calculated pKa values were  $5.31 \pm 0.07$  and  $4.95 \pm 0.03$  for 5-aminoisoquinoline and 6-aminoquinoline, respectively.

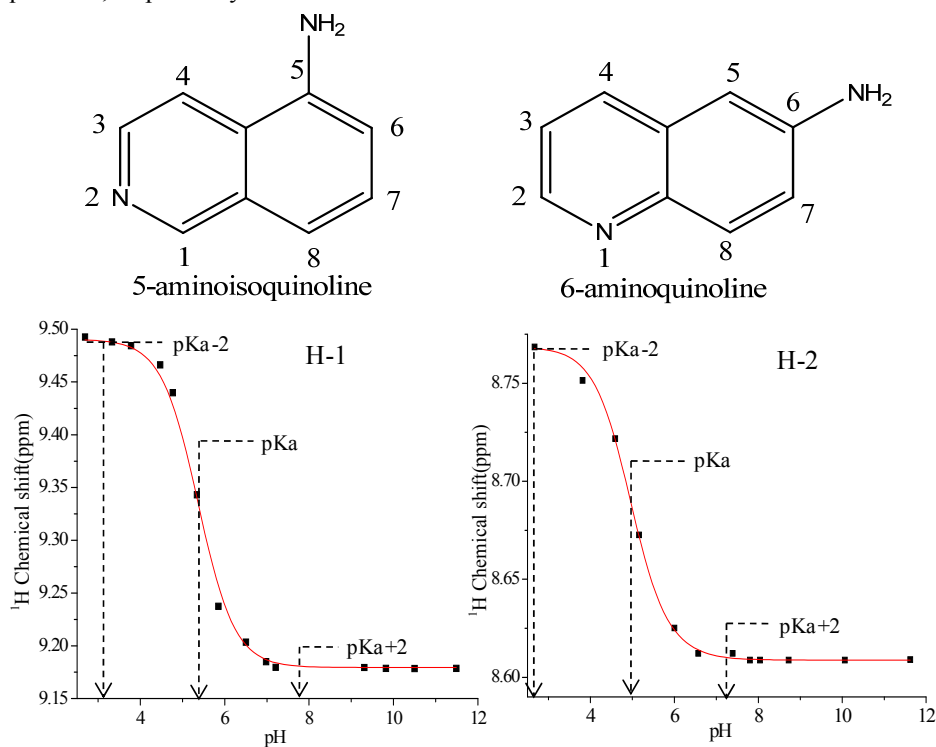

**Supplementary Figure S8.** Spectroscopic data for 5-AIQC. (a)  $^1\text{H}$  NMR spectrum in acetonitrile- $\text{d}_3$ ; (b) QTOF-MS spectrum in positive ion mode (in acetonitrile).

(a)

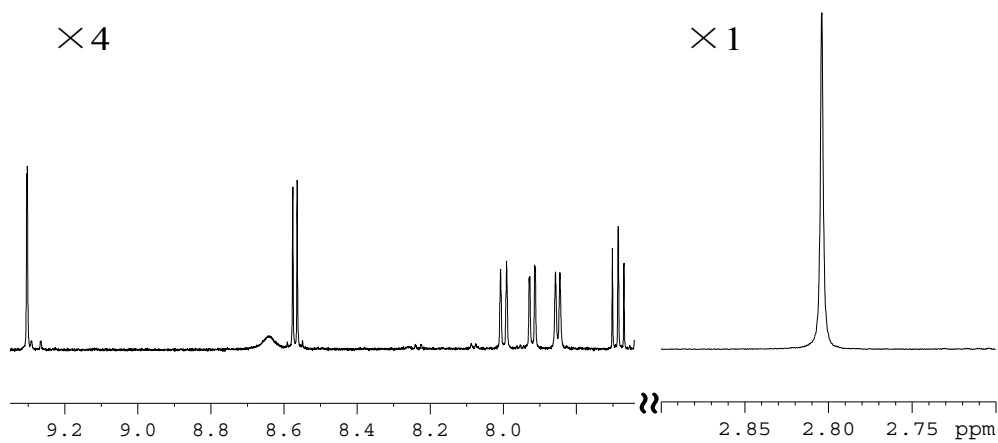

(b)

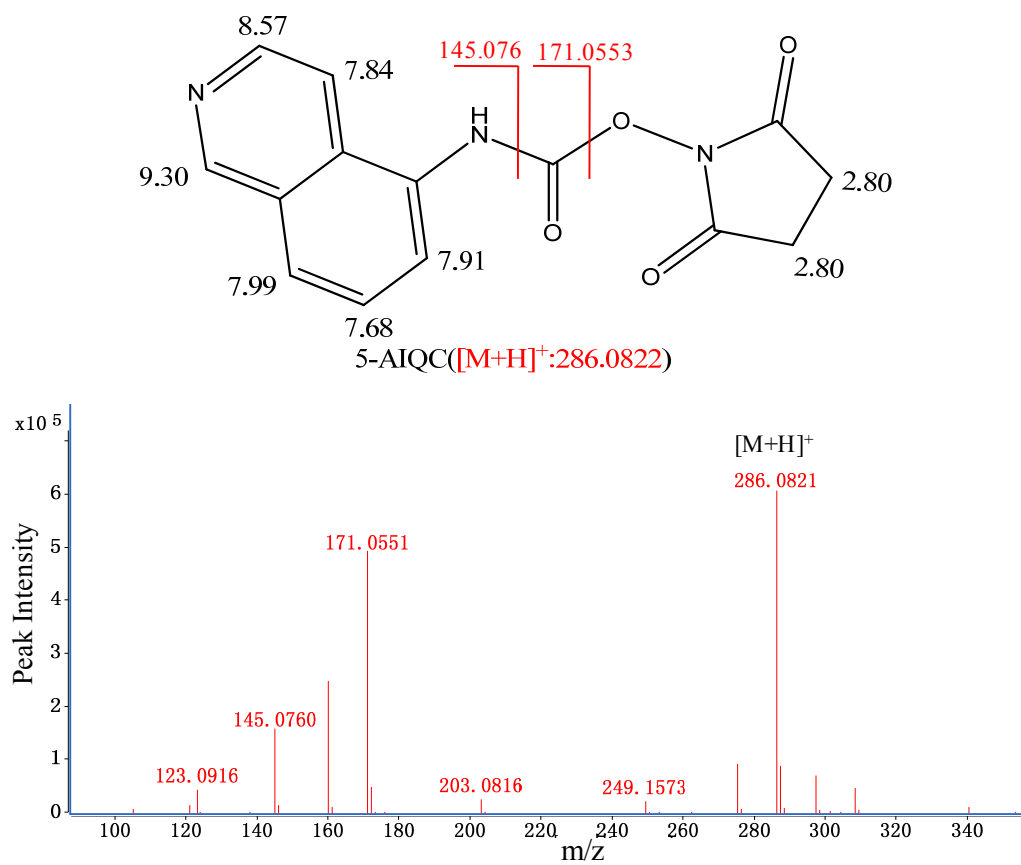

**Supplementary Table S1** Solutions of mixed standards ( $\mu\text{M}$ ) for method validation

|                                | Mix1 | Mix2 | Mix3 | Mix4 | Mix5 | Mix6 | Mix7 | Mix8 | Mix9 |
|--------------------------------|------|------|------|------|------|------|------|------|------|
| L-Asparagine                   | 200  | 100  | 50   | 25   | 10   | 5    | 1    | 0.5  | 0.1  |
| L-Histidine                    | 200  | 100  | 50   | 25   | 10   | 5    | 1    | 0.5  | 0.1  |
| L-Serine                       | 200  | 100  | 50   | 25   | 10   | 5    | 1    | 0.5  | 0.1  |
| Glycine                        | 200  | 100  | 50   | 25   | 10   | 5    | 1    | 0.5  | 0.1  |
| L-Glutamine                    | 200  | 100  | 50   | 25   | 10   | 5    | 1    | 0.5  | 0.1  |
| L-Arginine                     | 200  | 100  | 50   | 25   | 10   | 5    | 1    | 0.5  | 0.1  |
| L-Aspartic acid                | 200  | 100  | 50   | 25   | 10   | 5    | 1    | 0.5  | 0.1  |
| L-Glutamic acid                | 200  | 100  | 50   | 25   | 10   | 5    | 1    | 0.5  | 0.1  |
| L-Threonine                    | 200  | 100  | 50   | 25   | 10   | 5    | 1    | 0.5  | 0.1  |
| L-Alanine                      | 200  | 100  | 50   | 25   | 10   | 5    | 1    | 0.5  | 0.1  |
| L-Proline                      | 200  | 100  | 50   | 25   | 10   | 5    | 1    | 0.5  | 0.1  |
| L-Tyrosine                     | 100  | 50   | 25   | 12.5 | 5    | 2.5  | 0.5  | 0.25 | 0.05 |
| L-Methionine                   | 200  | 100  | 50   | 25   | 10   | 5    | 1    | 0.5  | 0.1  |
| L-Lysine                       | 200  | 100  | 50   | 25   | 10   | 5    | 1    | 0.5  | 0.1  |
| L-Valine                       | 200  | 100  | 50   | 25   | 10   | 5    | 1    | 0.5  | 0.1  |
| L-Isoleucine                   | 200  | 100  | 50   | 25   | 10   | 5    | 1    | 0.5  | 0.1  |
| L-Leucine                      | 200  | 100  | 50   | 25   | 10   | 5    | 1    | 0.5  | 0.1  |
| DL-Phenylalanine               | 200  | 100  | 50   | 25   | 10   | 5    | 1    | 0.5  | 0.1  |
| L-Tryptophan                   | 200  | 100  | 50   | 25   | 10   | 5    | 1    | 0.5  | 0.1  |
| D-Homoserine                   | 200  | 100  | 50   | 25   | 10   | 5    | 1    | 0.5  | 0.1  |
| $\beta$ -alanine               | 200  | 100  | 50   | 25   | 10   | 5    | 1    | 0.5  | 0.1  |
| L-Citrulline                   | 200  | 100  | 50   | 25   | 10   | 5    | 1    | 0.5  | 0.1  |
| L-Homoarginine                 | 100  | 50   | 25   | 12.5 | 5    | 2.5  | 0.5  | 0.25 | 0.05 |
| $\gamma$ -Aminobutyric acid    | 200  | 100  | 50   | 25   | 10   | 5    | 1    | 0.5  | 0.1  |
| L-Homocitrulline               | 200  | 100  | 50   | 25   | 10   | 5    | 1    | 0.5  | 0.1  |
| L-2-aminoadipic acid           | 100  | 50   | 25   | 12.5 | 5    | 2.5  | 0.5  | 0.25 | 0.05 |
| DL-3-Aminoisobutyric acid      | 200  | 100  | 50   | 25   | 10   | 5    | 1    | 0.5  | 0.1  |
| 2-Aminoisobutyric acid         | 200  | 100  | 50   | 25   | 10   | 5    | 1    | 0.5  | 0.1  |
| 5-Aminovaleric acid            | 200  | 100  | 50   | 25   | 10   | 5    | 1    | 0.5  | 0.1  |
| L-2-Aminobutyric acid          | 200  | 100  | 50   | 25   | 10   | 5    | 1    | 0.5  | 0.1  |
| 2,4-diaminobutanoic acid       | 200  | 100  | 50   | 25   | 10   | 5    | 1    | 0.5  | 0.1  |
| DL-2,6-Diaminopimelic acid     | 200  | 100  | 50   | 25   | 10   | 5    | 1    | 0.5  | 0.1  |
| L-Ornithine                    | 200  | 100  | 50   | 25   | 10   | 5    | 1    | 0.5  | 0.1  |
| 6-Aminocaproic acid            | 200  | 100  | 50   | 25   | 10   | 5    | 1    | 0.5  | 0.1  |
| L-Norvaline                    | 200  | 100  | 50   | 25   | 10   | 5    | 1    | 0.5  | 0.1  |
| D-(-)- $\alpha$ -Phenylglycine | 200  | 100  | 50   | 25   | 10   | 5    | 1    | 0.5  | 0.1  |
| L-Kynurenine                   | 100  | 50   | 25   | 12.5 | 5    | 2.5  | 0.5  | 0.25 | 0.05 |
| L-Norleucine                   | 100  | 50   | 25   | 12.5 | 5    | 2.5  | 0.5  | 0.25 | 0.05 |
| (-)-Norepinephrine             | 200  | 100  | 50   | 25   | 10   | 5    | 1    | 0.5  | 0.1  |
| ( $\pm$ )-Octopamine           | 200  | 100  | 50   | 25   | 10   | 5    | 1    | 0.5  | 0.1  |
| Dopamine                       | 200  | 100  | 50   | 25   | 10   | 5    | 1    | 0.5  | 0.1  |
| Tyramine                       | 200  | 100  | 50   | 25   | 10   | 5    | 1    | 0.5  | 0.1  |

|                                   |     |     |      |      |     |      |      |       |       |
|-----------------------------------|-----|-----|------|------|-----|------|------|-------|-------|
| 3-Methoxytyramine                 | 50  | 25  | 12.5 | 6.25 | 2.5 | 1.25 | 0.25 | 0.125 | 0.025 |
| Tryptamine                        | 200 | 100 | 50   | 25   | 10  | 5    | 1    | 0.5   | 0.1   |
| 4-Aminophenol                     | 200 | 100 | 50   | 25   | 10  | 5    | 1    | 0.5   | 0.1   |
| 4-Aminohippuric acid              | 200 | 100 | 50   | 25   | 10  | 5    | 1    | 0.5   | 0.1   |
| 3-Aminobenzoic acid               | 200 | 100 | 50   | 25   | 10  | 5    | 1    | 0.5   | 0.1   |
| 3-Aminosalicylic acid             | 100 | 50  | 25   | 12.5 | 5   | 2.5  | 0.5  | 0.25  | 0.05  |
| 4-Aminobenzoic acid               | 200 | 100 | 50   | 25   | 10  | 5    | 1    | 0.5   | 0.1   |
| L-Cysteic acid                    | 200 | 100 | 50   | 25   | 10  | 5    | 1    | 0.5   | 0.1   |
| Taurine                           | 200 | 100 | 50   | 25   | 10  | 5    | 1    | 0.5   | 0.1   |
| Hypotaurine                       | 100 | 50  | 25   | 12.5 | 5   | 2.5  | 0.5  | 0.25  | 0.05  |
| DL-Methionine sulfone             | 200 | 100 | 50   | 25   | 10  | 5    | 1    | 0.5   | 0.1   |
| DL-methionine sulfoxide           | 200 | 100 | 50   | 25   | 10  | 5    | 1    | 0.5   | 0.1   |
| Glutathione disulfide             | 40  | 20  | 10   | 5    | 2   | 1    | 0.2  | 0.1   | 0.02  |
| L-Cystine                         | 50  | 25  | 12.5 | 6.25 | 2.5 | 1.25 | 0.25 | 0.125 | 0.025 |
| Cystamine                         | 100 | 50  | 25   | 12.5 | 5   | 2.5  | 0.5  | 0.25  | 0.05  |
| L-Homocystine                     | 50  | 25  | 12.5 | 6.25 | 2.5 | 1.25 | 0.25 | 0.125 | 0.025 |
| Cystathionine                     | 100 | 50  | 25   | 12.5 | 5   | 2.5  | 0.5  | 0.25  | 0.05  |
| S-(2-Aminoethyl)-L-cysteine       | 200 | 100 | 50   | 25   | 10  | 5    | 1    | 0.5   | 0.1   |
| L-Cysteine                        | 100 | 50  | 25   | 12.5 | 5   | 2.5  | 0.5  | 0.25  | 0.05  |
| Djenkolic Acid                    | 200 | 100 | 50   | 25   | 10  | 5    | 1    | 0.5   | 0.1   |
| Cysteamine                        | 100 | 50  | 25   | 12.5 | 5   | 2.5  | 0.5  | 0.25  | 0.05  |
| DL-Ethionine                      | 100 | 50  | 25   | 12.5 | 5   | 2.5  | 0.5  | 0.25  | 0.05  |
| DL-Homocysteine                   | 100 | 50  | 25   | 12.5 | 5   | 2.5  | 0.5  | 0.25  | 0.05  |
| Glutathione                       | 100 | 50  | 25   | 12.5 | 5   | 2.5  | 0.5  | 0.25  | 0.05  |
| L-Carnosine                       | 200 | 100 | 50   | 25   | 10  | 5    | 1    | 0.5   | 0.1   |
| Ala-leu                           | 200 | 100 | 50   | 25   | 10  | 5    | 1    | 0.5   | 0.1   |
| Ala-Trp                           | 50  | 25  | 12.5 | 6.25 | 2.5 | 1.25 | 0.25 | 0.125 | 0.025 |
| <i>trans</i> -4-Hydroxy-L-proline | 200 | 100 | 50   | 25   | 10  | 5    | 1    | 0.5   | 0.1   |
| <i>O</i> -Phosphorylethanolamine  | 200 | 100 | 50   | 25   | 10  | 5    | 1    | 0.5   | 0.1   |
| Sarcosine                         | 200 | 100 | 50   | 25   | 10  | 5    | 1    | 0.5   | 0.1   |
| 3-Methyl-L-histidine              | 100 | 50  | 25   | 12.5 | 5   | 2.5  | 0.5  | 0.25  | 0.05  |
| 1-Methyl-L-histidine              | 100 | 50  | 25   | 12.5 | 5   | 2.5  | 0.5  | 0.25  | 0.05  |
| Asymmetric dimethylarginine       | 50  | 25  | 12.5 | 6.25 | 2.5 | 1.25 | 0.25 | 0.125 | 0.025 |
| <i>o</i> -acetyl-L-serine         | 200 | 100 | 50   | 25   | 10  | 5    | 1    | 0.5   | 0.1   |
| N $\alpha$ -Acetyl-L-lysine       | 200 | 100 | 50   | 25   | 10  | 5    | 1    | 0.5   | 0.1   |
| DL-5-Hydroxylysine                | 100 | 50  | 25   | 12.5 | 5   | 2.5  | 0.5  | 0.25  | 0.05  |
| 5-Hydroxy-L-tryptophan            | 200 | 100 | 50   | 25   | 10  | 5    | 1    | 0.5   | 0.1   |
| 4-Hydroxy-L-isoleucine            | 50  | 25  | 12.5 | 6.25 | 2.5 | 1.25 | 0.25 | 0.125 | 0.025 |
| Ethanolamine                      | 200 | 100 | 50   | 25   | 10  | 5    | 1    | 0.5   | 0.1   |
| Methylamine                       | 200 | 100 | 50   | 25   | 10  | 5    | 1    | 0.5   | 0.1   |
| Agmatine                          | 200 | 100 | 50   | 25   | 10  | 5    | 1    | 0.5   | 0.1   |
| Ethylamine                        | 200 | 100 | 50   | 25   | 10  | 5    | 1    | 0.5   | 0.1   |
| Putrescine                        | 200 | 100 | 50   | 25   | 10  | 5    | 1    | 0.5   | 0.1   |
| Cadaverine                        | 200 | 100 | 50   | 25   | 10  | 5    | 1    | 0.5   | 0.1   |

|                                |     |     |      |      |     |      |      |       |       |
|--------------------------------|-----|-----|------|------|-----|------|------|-------|-------|
| Spermine                       | 200 | 100 | 50   | 25   | 10  | 5    | 1    | 0.5   | 0.1   |
| Prolinamide                    | 200 | 100 | 50   | 25   | 10  | 5    | 1    | 0.5   | 0.1   |
| Allantoin                      | 100 | 50  | 25   | 12.5 | 5   | 2.5  | 0.5  | 0.25  | 0.05  |
| 5-Hydroxydopamine              | 50  | 25  | 12.5 | 6.25 | 2.5 | 1.25 | 0.25 | 0.125 | 0.025 |
| 3,4-dihydroxy-DL-phenylalanine | 200 | 100 | 50   | 25   | 10  | 5    | 1    | 0.5   | 0.1   |
| DL-Normetanephrine             | 100 | 50  | 25   | 12.5 | 5   | 2.5  | 0.5  | 0.25  | 0.05  |
| 1,3-Diaminopropane             | 200 | 100 | 50   | 25   | 10  | 5    | 1    | 0.5   | 0.1   |
| 1,2-Diaminopropane             | 200 | 100 | 50   | 25   | 10  | 5    | 1    | 0.5   | 0.1   |
| L-Tryptophanamide              | 100 | 50  | 25   | 12.5 | 5   | 2.5  | 0.5  | 0.25  | 0.05  |

---

**Supplementary Table S2.** Metabolic pathways covered by this quantification method

|                                         |                                       |
|-----------------------------------------|---------------------------------------|
| 1. Arg Pro Metabolism                   | L-Arginine                            |
|                                         | L-Proline                             |
|                                         | L-Glutamate                           |
|                                         | Sarcosine                             |
|                                         | L-Ornithine                           |
|                                         | trans-4-Hydroxy-L-proline             |
|                                         | Agmatine                              |
|                                         | Putrescine                            |
|                                         | 5-Aminovaleric acid                   |
|                                         | gamma-Aminobutyric acid               |
|                                         | 1,3-Diaminopropane                    |
|                                         | S-Adenosyl-L-methionine               |
|                                         | Spermidine                            |
|                                         | Spermine                              |
| 2. Urea Cycle and Arginine biosynthesis | L-Glutamine                           |
|                                         | NH <sub>3</sub>                       |
|                                         | L-Glutamate                           |
|                                         | L-Aspartate                           |
|                                         | L-Ornithine                           |
|                                         | L-Homocitrulline                      |
|                                         | L-Citrulline                          |
|                                         | L-Argininosuccinate                   |
|                                         | L-Arginine                            |
| 3. Tryptophan metabolism                | L-Tryptophan                          |
|                                         | 5-Hydroxy-L-tryptophan                |
|                                         | Serotonin                             |
|                                         | 5-Hydroxyindoleacetate                |
|                                         | N-Acetyl-5-hydroxytryptamine          |
|                                         | Tryptamine                            |
|                                         | L-Kynurenine                          |
|                                         | 3-Hydroxy-L-kynurenine                |
|                                         | 3-Hydroxyanthranilic acid             |
| 4. Phenylalanine Metabolism             | L-Tyrosine                            |
|                                         | L-Phenylalanine                       |
| 5. Tyrosine Metabolism                  | L-Tyrosine                            |
|                                         | Tyramine                              |
|                                         | 3,4-Dihydroxy-L-phenylalanine(L-Dopa) |
|                                         | Dopamine                              |
|                                         | 3-Methoxytyramine                     |
|                                         | Norepinephrine                        |
|                                         | L-Normetanephrine                     |

|                                                |                             |
|------------------------------------------------|-----------------------------|
| 6. Alanine, aspartate and glutamate metabolism | L-Alanine                   |
|                                                | L-Aspartate                 |
|                                                | L-Argininosuccinate         |
|                                                | L-Asparagine                |
|                                                | NH <sub>3</sub>             |
|                                                | L-Glutamate                 |
|                                                | gamma-Aminobutyric acid     |
|                                                | L-Glutamine                 |
| 7. Glutathione Metabolism                      | Glutathione disulfide       |
|                                                | Glutathione                 |
|                                                | L-Glutamate                 |
|                                                | L-Cysteine                  |
|                                                | Glycine                     |
|                                                | gamma-L-Glutamyl-L-cysteine |
|                                                | L-Ornithine                 |
|                                                | Putrescine                  |
|                                                | Spermidine                  |
|                                                | Spermine                    |
| Cadaverine                                     |                             |
| 8. Taurine & Hypotaurine Metabolism            | Taurine                     |
|                                                | L-Cysteine                  |
|                                                | Hypotaurine                 |
|                                                | Cysteamine                  |
|                                                | L-Cysteic acid              |
|                                                | L-Alanine                   |
|                                                | L-Glutamate                 |
| 9. Sulfur Metabolism                           | Taurine                     |
|                                                | L-Serine                    |
|                                                | L-Cysteine                  |
|                                                | L-Homocysteine              |
|                                                | L-Homoserine                |
| 10. β-Alanine metabolism                       | beta-Alanine                |
|                                                | L-Aspartate                 |
|                                                | Anserine                    |
|                                                | 1,3-Diaminopropane          |
|                                                | Spermidine                  |
|                                                | Spermine                    |
|                                                | 4-Aminobutanoate            |
|                                                | L-Histidine                 |
| Carnosine                                      |                             |
| 11. Val Leu Ile Metabolism                     | L-Threonine                 |
|                                                | L-Isoleucine                |

|                                              |                             |
|----------------------------------------------|-----------------------------|
|                                              | L-Valine                    |
|                                              | L-Leucine                   |
|                                              | L-2-Aminobutyric acid       |
| 12.Cysteine and methionine metabolism        | L-Serine                    |
|                                              | O-Acetyl-L-serine           |
|                                              | L-Cysteine                  |
|                                              | O-Phospho-L-serine          |
|                                              | Glutathione                 |
|                                              | L-Cystine                   |
|                                              | L-Cysteic acid              |
|                                              | L-Alanine                   |
|                                              | 2-Aminobutanoate            |
|                                              | L-Cystathionine             |
|                                              | L-Aspartate                 |
|                                              | L-Homoserine                |
|                                              | L-Serine                    |
|                                              | L-Homocysteine              |
|                                              | L-Homocystine               |
|                                              | L-Methionine                |
|                                              | L-Methionine S-oxide        |
| S-Adenosyl-L-methionine                      |                             |
| S-Adenosyl-L-homocysteine                    |                             |
| 13. Glycine, serine and threonine metabolism | O-Phospho-L-serine          |
|                                              | L-serine                    |
|                                              | L-Tryptophan                |
|                                              | Glycine                     |
|                                              | L-Cystathionine             |
|                                              | L-Cysteine                  |
|                                              | Sarcosine                   |
|                                              | NH <sub>3</sub>             |
|                                              | L-Threonine                 |
|                                              | L-Homoserine                |
|                                              | L-Aspartate                 |
|                                              | L-2,4-diaminobutyric acid   |
| 14. Lysine degradation                       | L-Lysine                    |
|                                              | L-Homocitrulline            |
|                                              | L-Homoarginine              |
|                                              | Saccharopine                |
|                                              | L-2-Amino adipate           |
|                                              | 5-Hydroxy-L-lysine          |
|                                              | Pipecolic acid              |
|                                              | N $\alpha$ -Acetyl-L-lysine |



|                                      |                                                           |
|--------------------------------------|-----------------------------------------------------------|
|                                      | 5-Aminovaleric acid                                       |
|                                      | 6-aminocaproic acid                                       |
|                                      | Cadaverine                                                |
| 15. Histidine metabolism             | N6,N6,N6-Trimethyl-L-lysine                               |
|                                      | L-Histidine                                               |
|                                      | 1-Methylhistidine                                         |
|                                      | Anserine                                                  |
|                                      | Carnosine                                                 |
|                                      | Histamine                                                 |
|                                      | L-Aspartate                                               |
| 16. Polyamine pathway                | L-Glutamate                                               |
|                                      | Putrescine                                                |
|                                      | Spermidine                                                |
|                                      | Spermine                                                  |
|                                      | Cadaverine                                                |
| 17. Pyrimidine and Purine metabolism | L-Glutamate                                               |
|                                      | 3-Aminoisobutyric acid                                    |
|                                      | $\beta$ -Alanine                                          |
|                                      | Allantoin                                                 |
| 18. Drug metabolism                  | Procaine                                                  |
|                                      | 4-Aminohippuric acid                                      |
|                                      | 2-Aminoisobutyric acid                                    |
|                                      | <i>p</i> -Aminophenol                                     |
|                                      | Desipramine                                               |
| 19. Gut microbiota metabolism        | Methylamine                                               |
|                                      | 2,6-Diaminopimelic acid                                   |
| 20. Posttranslational modifications  | O-Phospho-L-tyrosine                                      |
|                                      | N6-Acetyl-L-lysine                                        |
|                                      | O-Phospho-L-threonine                                     |
|                                      | O-Phospho-L-serine                                        |
|                                      | N $\epsilon$ ,N $\epsilon$ ,N $\epsilon$ -Trimethyllysine |
| 21. Glycerophospholipid metabolism   | O-Phosphorylethanolamine                                  |
|                                      | Ethanolamine                                              |
|                                      | Sacosine                                                  |

**Supplementary Table S3.** Intra- and inter-day variations (RSD %) for retention time (RT) and concentration (C) of analytes (n=5). RT<sub>L</sub>, RT<sub>M</sub>, RT<sub>H</sub>, C<sub>L</sub>, C<sub>M</sub>, C<sub>H</sub> were parameters at low, intermediate and high concentration range.

| Analytes                | Intra-day (n=5, RSD,%) |                 |                |                 |                |                 |                | Inter-day (n=5, RSD,%) |                |                 |                |                 |                |
|-------------------------|------------------------|-----------------|----------------|-----------------|----------------|-----------------|----------------|------------------------|----------------|-----------------|----------------|-----------------|----------------|
|                         | RT                     | RT <sub>L</sub> | C <sub>L</sub> | RT <sub>M</sub> | C <sub>M</sub> | RT <sub>H</sub> | C <sub>H</sub> | RT <sub>L</sub>        | C <sub>L</sub> | RT <sub>M</sub> | C <sub>M</sub> | RT <sub>H</sub> | C <sub>H</sub> |
| L-Asparagine            | 3.847                  | 3.5             | 5.1            | 2.1             | 7.5            | 0.6             | 7.2            | 4.8                    | 7.3            | 5.1             | 11.9           | 5.9             | 8.8            |
| L-Histidine             | 3.957                  | 2.4             | 2.1            | 1.8             | 6.6            | 0.7             | 6.0            | 3.7                    | 9.9            | 4.3             | 10.4           | 5.1             | 14.8           |
| L-Serine                | 4.024                  | 3.0             | 13.7           | 2.0             | 8.7            | 0.5             | 6.7            | 4.5                    | 12.6           | 4.8             | 13.0           | 5.7             | 10.9           |
| Glycine                 | 4.278                  | 2.7             | 11.4           | 1.7             | 7.5            | 0.6             | 7.4            | 4.3                    | 9.9            | 4.6             | 13.9           | 5.4             | 14.4           |
| L-Glutamine             | 4.74                   | 2.2             | 12.2           | 1.3             | 7.5            | 0.4             | 6.0            | 3.3                    | 12.7           | 3.5             | 12.2           | 4.1             | 11.2           |
| L-Arginine              | 5.016                  | 1.2             | 2.6            | 0.9             | 7.4            | 0.4             | 6.7            | 2.3                    | 2.3            | 2.6             | 8.6            | 3.2             | 13.9           |
| L-Aspartic acid         | 5.021                  | 1.6             | 11.1           | 1.0             | 9.2            | 0.3             | 8.5            | 2.9                    | 13.7           | 3.1             | 14.2           | 3.7             | 12.0           |
| L-Glutamic acid         | 5.703                  | 0.9             | 7.0            | 0.6             | 10.7           | 0.2             | 5.0            | 2.1                    | 5.8            | 2.2             | 12.2           | 2.8             | 10.2           |
| L-Threonine             | 5.979                  | 0.8             | 13.8           | 0.5             | 5.9            | 0.2             | 5.9            | 1.9                    | 12.0           | 2.0             | 10.0           | 2.5             | 12.9           |
| L-Alanine               | 6.27                   | 0.7             | 11.8           | 0.5             | 10.9           | 0.2             | 5.7            | 1.8                    | 10.1           | 1.9             | 12.2           | 2.5             | 12.8           |
| L-Proline               | 6.538                  | 0.5             | 11.5           | 0.4             | 9.5            | 0.2             | 4.3            | 1.5                    | 9.2            | 1.7             | 14.0           | 2.1             | 10.2           |
| L-Tyrosine              | 8.709                  | 0.2             | 7.0            | 0.2             | 7.7            | 0.1             | 4.2            | 1.4                    | 12.9           | 1.5             | 11.5           | 2.0             | 9.2            |
| L-Methionine            | 8.911                  | 0.4             | 7.7            | 0.3             | 9.4            | 0.1             | 4.5            | 1.6                    | 6.6            | 1.9             | 11.3           | 2.4             | 12.2           |
| L-Lysine                | 9.202                  | 0.8             | 5.9            | 0.5             | 7.1            | 0.2             | 7.4            | 1.9                    | 7.0            | 2.1             | 8.8            | 2.5             | 10.2           |
| L-Valine                | 9.515                  | 0.4             | 12.1           | 0.3             | 7.4            | 0.2             | 3.7            | 2.1                    | 10.8           | 2.3             | 10.9           | 2.9             | 8.9            |
| L-Isoleucine            | 12.671                 | 0.5             | 9.5            | 0.4             | 8.1            | 0.3             | 5.0            | 1.6                    | 13.7           | 1.7             | 11.8           | 1.7             | 13.3           |
| L-Leucine               | 12.738                 | 0.5             | 9.0            | 0.3             | 7.4            | 0.3             | 4.8            | 1.6                    | 12.6           | 1.7             | 10.1           | 1.8             | 12.3           |
| DL-Phenylalanine        | 12.783                 | 0.4             | 11.6           | 0.4             | 6.7            | 0.2             | 4.9            | 1.6                    | 14.5           | 1.7             | 10.7           | 2.0             | 12.3           |
| L-Tryptophan            | 12.992                 | 0.2             | 7.6            | 0.1             | 5.8            | 0.1             | 4.3            | 1.0                    | 8.5            | 1.1             | 13.3           | 1.3             | 13.1           |
| D-Homoserine            | 4.942                  | 1.2             | 8.3            | 1.1             | 5.2            | 0.4             | 6.0            | 3.3                    | 13.5           | 3.1             | 13.5           | 3.7             | 14.5           |
| β-alanine               | 5.844                  | 0.8             | 10.3           | 0.6             | 4.4            | 0.2             | 5.3            | 2.0                    | 13.1           | 2.1             | 7.6            | 2.7             | 10.0           |
| L-Citrulline            | 5.867                  | 0.8             | 13.7           | 0.5             | 10.9           | 0.2             | 4.8            | 1.8                    | 14.4           | 1.9             | 10.9           | 2.5             | 13.2           |
| L-Homoarginine          | 5.934                  | 0.2             | 9.9            | 0.4             | 7.5            | 0.2             | 5.3            | 2.5                    | 14.7           | 1.6             | 11.3           | 2.1             | 13.3           |
| γ-Aminobutyric acid     | 6.665                  | 0.6             | 8.5            | 0.4             | 8.9            | 0.2             | 5.5            | 1.6                    | 6.9            | 1.7             | 13.6           | 2.3             | 9.6            |
| L-Homocitrulline        | 6.946                  | 0.3             | 6.5            | 0.3             | 5.2            | 0.2             | 5.7            | 1.5                    | 7.2            | 1.5             | 13.0           | 2.0             | 11.7           |
| L-2-aminoadipic acid    | 7.075                  | 0.4             | 14.0           | 0.3             | 9.6            | 0.1             | 5.5            | 1.5                    | 12.6           | 1.6             | 15.1           | 2.1             | 11.9           |
| 3-aminoisobutyric acid  | 7.172                  | 0.5             | 11.5           | 0.3             | 12.1           | 0.2             | 3.9            | 1.6                    | 9.4            | 1.8             | 10.4           | 2.3             | 8.5            |
| 2-aminoisobutyric acid  | 7.613                  | 0.4             | 54.0           | 0.3             | 53.0           | 0.2             | 40.7           | 1.3                    | 82.3           | 1.7             | 90.6           | 2.2             | 78.6           |
| 5-aminovaleric acid     | 7.754                  | 0.3             | 5.5            | 0.3             | 5.6            | 0.1             | 4.1            | 1.6                    | 5.4            | 1.7             | 9.2            | 2.1             | 9.7            |
| L-2-aminobutyric acid   | 7.792                  | 0.4             | 11.4           | 0.3             | 8.9            | 0.2             | 3.9            | 1.6                    | 10.0           | 1.7             | 13.3           | 2.2             | 11.5           |
| 2,4-diaminobutyric acid | 7.859                  | 0.5             | 6.1            | 0.5             | 7.2            | 0.2             | 6.4            | 1.7                    | 5.5            | 1.7             | 11.5           | 2.1             | 11.5           |
| 2,6-diaminopimelic acid | 8.195                  | 0.7             | 8.3            | 0.8             | 8.3            | 0.9             | 7.5            | 1.5                    | 9.9            | 1.9             | 11.9           | 1.9             | 11.2           |
| L-Ornithine             | 8.321                  | 0.6             | 10.0           | 0.4             | 8.1            | 0.2             | 7.5            | 1.5                    | 9.7            | 1.6             | 12.5           | 2.0             | 11.9           |
| 6-Aminocaproic acid     | 9.053                  | 0.3             | 8.5            | 0.3             | 5.3            | 0.2             | 5.6            | 1.8                    | 8.9            | 1.9             | 12.9           | 2.4             | 8.3            |
| L-Norvaline             | 9.709                  | 0.3             | 7.1            | 0.3             | 7.4            | 0.2             | 4.5            | 2.3                    | 7.4            | 2.3             | 10.2           | 2.9             | 11.0           |
| D-(−)-α-phenylglycine   | 10.224                 | 0.3             | 5.4            | 0.2             | 9.4            | 0.1             | 5.6            | 2.2                    | 7.6            | 2.4             | 15.4           | 3.0             | 13.6           |
| L-Kynurenine            | 11.753                 | 0.4             | 4.8            | 0.4             | 10.0           | 0.2             | 5.6            | 2.7                    | 5.5            | 2.8             | 13.9           | 3.6             | 13.9           |
| L-Norleucine            | 13.156                 | 0.2             | 8.7            | 0.1             | 7.3            | 0.0             | 4.7            | 0.9                    | 7.4            | 0.8             | 15.5           | 1.2             | 13.3           |
| (−)-Norepinephrine      | 6.882                  | 0.6             | 6.5            | 0.4             | 7.8            | 0.2             | 4.8            | 1.5                    | 4.9            | 1.7             | 13.3           | 2.1             | 12.5           |

|                               |        |     |      |     |      |     |      |     |      |     |      |     |      |
|-------------------------------|--------|-----|------|-----|------|-----|------|-----|------|-----|------|-----|------|
| (±)-Octopamine                | 7.59   | 0.4 | 4.1  | 0.3 | 8.0  | 0.2 | 3.9  | 1.6 | 6.1  | 1.7 | 12.0 | 2.1 | 9.5  |
| Dopamine                      | 8.336  | 0.4 | 4.7  | 0.3 | 10.4 | 0.2 | 3.9  | 1.4 | 4.6  | 1.6 | 14.2 | 2.1 | 12.6 |
| Tyramine                      | 9.358  | 0.4 | 8.0  | 0.3 | 9.3  | 0.2 | 3.9  | 2.0 | 7.3  | 2.1 | 10.7 | 2.7 | 7.5  |
| 3-Methoxytyramine             | 10.008 | 0.6 | 12.2 | 0.4 | 8.1  | 0.2 | 4.1  | 2.0 | 10.1 | 2.3 | 11.7 | 2.9 | 8.4  |
| Tryptamine                    | 13.305 | 0.1 | 2.7  | 0.1 | 6.9  | 0.1 | 5.2  | 0.8 | 2.7  | 0.8 | 13.9 | 1.0 | 13.0 |
| 4-Aminophenol                 | 8.165  | 0.4 | 3.9  | 0.4 | 5.3  | 0.2 | 4.0  | 1.8 | 3.6  | 1.8 | 10.6 | 2.3 | 11.6 |
| 4-Aminohippuric acid          | 9.202  | 0.2 | 13.9 | 0.5 | 7.8  | 0.2 | 6.5  | 3.0 | 19.7 | 2.0 | 12.0 | 2.6 | 7.9  |
| 3-Aminobenzoic acid           | 11.477 | 0.7 | 3.7  | 0.8 | 9.0  | 0.3 | 6.8  | 3.5 | 5.0  | 3.6 | 13.3 | 4.5 | 10.3 |
| 3-Aminosalicylic acid         | 11.574 | 0.3 | 4.3  | 0.2 | 8.1  | 0.1 | 4.9  | 2.5 | 4.5  | 2.5 | 14.0 | 3.4 | 17.8 |
| 4-Aminobenzoic acid           | 11.649 | 0.6 | 4.8  | 0.5 | 6.4  | 0.3 | 5.1  | 3.1 | 4.3  | 3.3 | 8.9  | 4.1 | 6.3  |
| L-Cysteic acid                | 3.473  | 3.2 | 10.3 | 3.1 | 7.2  | 0.9 | 7.8  | 6.6 | 14.7 | 6.4 | 21.3 | 6.8 | 18.3 |
| Taurine                       | 4.733  | 2.4 | 13.8 | 1.4 | 6.2  | 0.4 | 6.0  | 3.5 | 12.7 | 3.7 | 12.7 | 4.3 | 13.4 |
| Hypotaurine                   | 4.875  | 2.2 | 6.5  | 1.2 | 4.8  | 0.4 | 7.1  | 3.3 | 8.4  | 3.4 | 13.0 | 4.0 | 12.8 |
| Methionine sulfone            | 5.546  | 0.8 | 6.1  | 0.7 | 9.6  | 0.2 | 4.9  | 2.4 | 9.6  | 2.3 | 13.6 | 2.9 | 14.0 |
| Methionine sulfoxide          | 5.606  | 0.7 | 11.1 | 0.7 | 9.7  | 0.2 | 6.7  | 2.2 | 11.0 | 2.1 | 11.7 | 2.7 | 14.7 |
| Glutathione disulfide         | 6.844  | 0.5 | 13.9 | 0.3 | 14.0 | 0.1 | 5.3  | 1.3 | 14.0 | 1.6 | 12.7 | 2.1 | 13.7 |
| L-Cystine                     | 6.882  | 0.6 | 9.9  | 0.4 | 10.6 | 0.1 | 5.9  | 1.8 | 9.3  | 1.9 | 16.3 | 2.5 | 16.7 |
| Cystamine                     | 7.232  | 0.7 | 9.7  | 0.4 | 8.4  | 0.2 | 5.1  | 1.7 | 9.3  | 2.0 | 14.4 | 2.2 | 14.0 |
| L-Homocystine                 | 7.896  | 0.5 | 9.1  | 0.3 | 9.8  | 0.1 | 4.8  | 1.6 | 9.6  | 1.8 | 11.5 | 2.3 | 13.0 |
| Cystathionine                 | 8.956  | 0.6 | 11.1 | 0.3 | 9.1  | 0.2 | 9.0  | 1.5 | 12.2 | 1.6 | 15.0 | 2.1 | 14.0 |
| S-(2-aminoethyl)-L-Cys        | 8.985  | 0.5 | 3.5  | 0.4 | 7.4  | 0.2 | 8.7  | 1.9 | 3.9  | 1.9 | 13.0 | 2.3 | 12.4 |
| L-Cysteine                    | 9.261  | 0.5 | 7.9  | 0.2 | 11.2 | 0.1 | 6.1  | 1.8 | 9.5  | 1.9 | 11.6 | 2.4 | 12.5 |
| Djenkolic Acid                | 10.112 | 0.4 | 5.2  | 0.4 | 9.9  | 0.2 | 6.9  | 2.4 | 7.1  | 2.3 | 13.7 | 2.9 | 14.5 |
| Cysteamine                    | 10.246 | 0.7 | 5.1  | 0.5 | 6.4  | 0.2 | 3.2  | 2.3 | 4.6  | 2.5 | 9.3  | 3.1 | 7.8  |
| DL-Ethionine                  | 11.201 | 0.4 | 7.2  | 0.4 | 9.6  | 0.2 | 5.3  | 2.8 | 8.7  | 3.0 | 14.5 | 3.6 | 12.4 |
| DL-Homocysteine               | 10.291 | 1.4 | 9.4  | 1.8 | 6.3  | 1.3 | 3.9  | 1.3 | 7.9  | 3.1 | 10.5 | 4.0 | 10.1 |
| Glutathione                   | 10.611 | 1.7 | 10.0 | 1.5 | 11.9 | 0.1 | 4.9  | 1.9 | 13.9 | 2.2 | 13.1 | 1.6 | 13.6 |
| L-Carnosine                   | 4.964  | 0.7 | 3.7  | 1.0 | 7.9  | 0.4 | 5.6  | 3.0 | 3.1  | 2.7 | 12.2 | 3.3 | 13.9 |
| Ala-leu                       | 11.574 | 0.7 | 8.4  | 0.5 | 8.0  | 0.2 | 3.6  | 2.7 | 8.0  | 3.3 | 7.8  | 3.8 | 7.9  |
| Ala-Trp                       | 11.753 | 0.4 | 5.0  | 0.4 | 7.4  | 0.2 | 4.5  | 2.6 | 5.1  | 2.8 | 13.4 | 3.6 | 12.4 |
| <i>trans</i> -4-hydroxy-L-Pro | 3.091  | 4.9 | 4.0  | 3.0 | 9.6  | 0.8 | 6.2  | 6.0 | 11.9 | 6.4 | 14.2 | 6.8 | 11.9 |
| O-PE                          | 3.875  | 2.1 | 5.9  | 2.1 | 5.5  | 0.6 | 6.3  | 5.1 | 5.2  | 5.0 | 10.6 | 5.8 | 9.9  |
| Sarcosine                     | 4.412  | 2.4 | 53.9 | 1.7 | 27.2 | 0.5 | 45.6 | 5.7 | 72.5 | 3.9 | 78.4 | 4.8 | 85.2 |
| 3-Methyl-L-histidine          | 4.457  | 3.1 | 3.9  | 1.2 | 12.5 | 0.4 | 7.0  | 3.8 | 14.4 | 2.7 | 12.2 | 3.4 | 13.1 |
| 1-Methyl-L-histidine          | 4.897  | 0.4 | 14.2 | 1.3 | 11.6 | 0.6 | 5.5  | 5.3 | 12.6 | 3.7 | 14.5 | 4.5 | 12.2 |
| ADMA                          | 6.24   | 0.7 | 7.4  | 0.5 | 8.2  | 0.2 | 4.7  | 1.9 | 13.5 | 1.6 | 13.5 | 2.6 | 10.7 |
| O-acetyl-L-serine             | 6.941  | 0.3 | 7.3  | 0.3 | 7.1  | 0.1 | 5.8  | 1.7 | 10.3 | 1.7 | 11.7 | 2.3 | 13.7 |
| N $\alpha$ -Acetyl-L-lysine   | 7.59   | 0.3 | 8.4  | 0.2 | 11.5 | 0.1 | 3.6  | 1.5 | 8.2  | 1.5 | 11.0 | 2.0 | 9.3  |
| DL-5-Hydroxylysine            | 7.986  | 0.6 | 13.9 | 0.4 | 6.8  | 0.2 | 8.1  | 1.4 | 12.7 | 1.6 | 12.4 | 2.0 | 12.8 |
| 5-hydroxy-L-Trp               | 8.001  | 0.2 | 2.4  | 0.2 | 4.8  | 0.1 | 4.9  | 1.3 | 4.9  | 1.4 | 11.7 | 1.8 | 20.3 |
| 4-hydroxy-L-Ile               | 8.404  | 0.2 | 18.8 | 0.2 | 16.1 | 0.2 | 11.5 | 1.6 | 19.4 | 1.6 | 19.3 | 2.1 | 11.8 |
| Ethanolamine                  | 5.024  | 1.6 | 12.8 | 1.0 | 5.6  | 0.4 | 8.4  | 2.7 | 11.2 | 2.9 | 10.7 | 3.6 | 12.5 |

|                      |        |     |      |     |      |     |      |     |      |     |      |     |      |
|----------------------|--------|-----|------|-----|------|-----|------|-----|------|-----|------|-----|------|
| Methylamine          | 5.076  | 1.1 | 13.4 | 1.0 | 5.9  | 0.5 | 8.7  | 3.0 | 11.5 | 2.9 | 14.4 | 3.6 | 12.9 |
| Agmatine             | 5.68   | 0.4 | 13.2 | 0.4 | 10.9 | 0.3 | 4.7  | 1.6 | 11.9 | 1.6 | 15.9 | 2.2 | 10.2 |
| Ethylamine           | 6.613  | 0.5 | 4.6  | 0.5 | 9.4  | 0.2 | 5.6  | 2.0 | 4.4  | 2.0 | 13.0 | 2.5 | 10.0 |
| Putrescine           | 9.008  | 0.6 | 5.9  | 0.5 | 7.0  | 0.2 | 8.2  | 2.1 | 5.5  | 2.1 | 12.2 | 2.6 | 10.1 |
| Cadaverine           | 10.284 | 1.1 | 5.0  | 0.8 | 5.2  | 0.4 | 6.6  | 2.5 | 6.6  | 3.0 | 9.8  | 3.6 | 9.5  |
| Spermine             | 13.292 | 0.2 | 2.3  | 0.1 | 6.9  | 0.1 | 9.1  | 0.7 | 3.7  | 0.6 | 9.4  | 0.7 | 12.1 |
| Prolinamide          | 5.501  | 0.8 | 12.8 | 0.6 | 9.5  | 0.2 | 6.3  | 2.1 | 10.9 | 2.0 | 14.7 | 2.6 | 10.7 |
| Allantoin            | 6.521  | 0.7 | 9.3  | 0.6 | 16.6 | 0.2 | 10.3 | 1.9 | 14.9 | 1.9 | 15.6 | 2.4 | 15.0 |
| 5-Hydroxydopamine    | 7.061  | 0.4 | 6.5  | 0.3 | 9.3  | 0.2 | 4.7  | 1.7 | 5.8  | 1.6 | 13.1 | 2.1 | 12.0 |
| 3,4-dihydroxy-DL-Phe | 7.725  | 0.2 | 5.0  | 0.2 | 6.4  | 0.1 | 3.9  | 1.3 | 4.5  | 1.4 | 14.1 | 1.9 | 17.2 |
| DL-Normetanephrine   | 8.045  | 0.4 | 9.2  | 0.3 | 9.8  | 0.1 | 4.7  | 1.4 | 7.8  | 1.6 | 12.3 | 2.0 | 9.7  |
| 1,3-Diaminopropane   | 8.418  | 0.6 | 3.5  | 0.5 | 5.3  | 0.2 | 7.3  | 1.8 | 3.3  | 1.9 | 8.6  | 2.3 | 9.8  |
| 1,2-Diaminopropane   | 8.821  | 0.6 | 7.9  | 0.5 | 6.7  | 0.2 | 8.3  | 2.0 | 7.6  | 2.0 | 9.3  | 2.5 | 13.2 |
| L-Tryptophanamide    | 10.649 | 0.5 | 12.9 | 0.5 | 8.4  | 0.3 | 2.8  | 2.7 | 11.5 | 2.8 | 14.4 | 3.4 | 13.5 |

O-PE: O-phosphorylethanolamine; ADMA: asymmetric dimethylarginine; Phe: phenylalanine; Pro: proline; Trp: tryptophan; Ile: isoleucine; Cys: cysteine.

**Supplementary Table S4.** Sensitivity enhancement by jointly using the Stream Jet ion sources and iFunnel technology (on an Agilent 6495 triple-quad spectrometer)

| Name                | Neutral formula                                                 | Theoretical (m/z) | Q1 (m/z) | Q3 (m/z) | CE | RT     | LOD (fmol) | Linear range (μM) | R <sup>2</sup> |
|---------------------|-----------------------------------------------------------------|-------------------|----------|----------|----|--------|------------|-------------------|----------------|
| L-Asparagine        | C <sub>14</sub> H <sub>14</sub> N <sub>4</sub> O <sub>4</sub>   | 303.1088          | 303      | 171      | 20 | 3.999  | 0.2        | 0.1-200           | 0.9983         |
| L-Histidine         | C <sub>16</sub> H <sub>15</sub> N <sub>5</sub> O <sub>3</sub>   | 326.1248          | 326      | 171      | 20 | 4.161  | 1          | 0.3-200           | 0.996          |
| L-Serine            | C <sub>13</sub> H <sub>13</sub> N <sub>3</sub> O <sub>4</sub>   | 276.0979          | 276      | 171      | 20 | 4.157  | 0.2        | 0.1-200           | 0.9941         |
| Glycine             | C <sub>12</sub> H <sub>11</sub> N <sub>3</sub> O <sub>3</sub>   | 246.0873          | 246      | 171      | 20 | 4.407  | 0.2        | 0.1-200           | 0.9945         |
| L-Glutamine         | C <sub>15</sub> H <sub>16</sub> N <sub>4</sub> O <sub>4</sub>   | 317.1244          | 317      | 171      | 20 | 4.905  | 0.4        | 0.1-200           | 0.995          |
| L-Arginine          | C <sub>16</sub> H <sub>20</sub> N <sub>6</sub> O <sub>3</sub>   | 345.167           | 345      | 171      | 20 | 5.169  | 3.9        | 1.3-200           | 0.9953         |
| L-Aspartic acid     | C <sub>14</sub> H <sub>13</sub> N <sub>3</sub> O <sub>5</sub>   | 304.0928          | 304      | 171      | 20 | 5.172  | 0.5        | 0.2-200           | 0.9925         |
| L-Glutamic acid     | C <sub>15</sub> H <sub>15</sub> N <sub>3</sub> O <sub>5</sub>   | 318.1084          | 318      | 171      | 20 | 5.831  | 0.2        | 0.1-200           | 0.9956         |
| L-Threonine         | C <sub>14</sub> H <sub>15</sub> N <sub>3</sub> O <sub>4</sub>   | 290.1135          | 290      | 171      | 20 | 6.092  | 0.1        | 0.04-200          | 0.996          |
| L-Alanine           | C <sub>13</sub> H <sub>13</sub> N <sub>3</sub> O <sub>3</sub>   | 260.103           | 260      | 171      | 20 | 6.384  | 0.1        | 0.05-200          | 0.9984         |
| L-Proline           | C <sub>15</sub> H <sub>15</sub> N <sub>3</sub> O <sub>3</sub>   | 286.1186          | 286      | 171      | 20 | 6.609  | 0.1        | 0.05-200          | 0.9994         |
| L-Tyrosine          | C <sub>19</sub> H <sub>17</sub> N <sub>3</sub> O <sub>4</sub>   | 352.1292          | 352      | 171      | 20 | 8.902  | 0.2        | 0.1-100           | 0.9924         |
| L-Methionine        | C <sub>15</sub> H <sub>17</sub> N <sub>3</sub> O <sub>3</sub> S | 320.1063          | 320      | 171      | 20 | 9.032  | 0.3        | 0.1-200           | 0.9949         |
| L-Lysine            | C <sub>26</sub> H <sub>26</sub> N <sub>6</sub> O <sub>4</sub>   | 244.1081          | 244      | 171      | 10 | 9.335  | 0.3        | 0.1-200           | 0.991          |
| L-Valine            | C <sub>15</sub> H <sub>17</sub> N <sub>3</sub> O <sub>3</sub>   | 288.1343          | 288      | 171      | 20 | 9.635  | 0.3        | 0.1-200           | 0.9955         |
| L-Isoleucine        | C <sub>16</sub> H <sub>19</sub> N <sub>3</sub> O <sub>3</sub>   | 302.1499          | 302      | 171      | 20 | 12.879 | 0.4        | 0.1-200           | 0.9912         |
| L-Leucine           | C <sub>16</sub> H <sub>19</sub> N <sub>3</sub> O <sub>3</sub>   | 302.1499          | 302      | 171      | 20 | 12.947 | 0.3        | 0.1-200           | 0.9938         |
| DL-Phenylalanine    | C <sub>19</sub> H <sub>17</sub> N <sub>3</sub> O <sub>3</sub>   | 336.1343          | 336      | 171      | 20 | 13.039 | 0.3        | 0.1-200           | 0.9952         |
| L-Tryptophan        | C <sub>21</sub> H <sub>18</sub> N <sub>4</sub> O <sub>3</sub>   | 375.1452          | 375      | 171      | 20 | 13.268 | 0.4        | 0.1-200           | 0.9945         |
| D-Homoserine        | C <sub>14</sub> H <sub>15</sub> N <sub>3</sub> O <sub>4</sub>   | 290.1135          | 290      | 171      | 20 | 5.073  | 0.4        | 0.1-200           | 0.9976         |
| β-alanine           | C <sub>13</sub> H <sub>13</sub> N <sub>3</sub> O <sub>3</sub>   | 260.103           | 260      | 171      | 20 | 5.965  | 0.2        | 0.1-200           | 0.9949         |
| L-Citrulline        | C <sub>16</sub> H <sub>19</sub> N <sub>5</sub> O <sub>4</sub>   | 346.151           | 346      | 171      | 20 | 5.991  | 0.7        | 0.2-200           | 0.9938         |
| L-Homoarginine      | C <sub>17</sub> H <sub>22</sub> N <sub>6</sub> O <sub>3</sub>   | 359.1826          | 359      | 171      | 20 | 6.049  | 2.1        | 0.7-100           | 0.9982         |
| γ-Aminobutyric acid | C <sub>14</sub> H <sub>15</sub> N <sub>3</sub> O <sub>3</sub>   | 274.1186          | 274      | 171      | 20 | 6.775  | 0.3        | 0.1-200           | 0.9902         |

|                            |                                                                 |          |     |     |    |             |     |         |        |
|----------------------------|-----------------------------------------------------------------|----------|-----|-----|----|-------------|-----|---------|--------|
| L-Homocitrulline           | C <sub>17</sub> H <sub>21</sub> N <sub>5</sub> O <sub>4</sub>   | 360.1666 | 360 | 171 | 20 | 7.075       | 0.3 | 0.1-200 | 0.9956 |
| L-2-aminoadipic acid       | C <sub>16</sub> H <sub>17</sub> N <sub>3</sub> O <sub>5</sub>   | 332.1241 | 332 | 171 | 20 | 7.198       | 0.3 | 0.1-100 | 0.9914 |
| DL-3-Aminoisobutyric acid  | C <sub>14</sub> H <sub>15</sub> N <sub>3</sub> O <sub>3</sub>   | 274.1186 | 274 | 171 | 20 | 7.282       | 0.2 | 0.1-200 | 0.9909 |
| 2-Aminoisobutyric acid     | C <sub>14</sub> H <sub>15</sub> N <sub>3</sub> O <sub>3</sub>   | 274.1186 | 274 | 171 | 20 | 7.744       | 0.9 | 0.3-200 | 0.9981 |
| 5-Aminovaleric acid        | C <sub>15</sub> H <sub>17</sub> N <sub>3</sub> O <sub>3</sub>   | 288.1343 | 288 | 171 | 20 | 7.875       | 0.4 | 0.1-200 | 0.9976 |
| L-2-Aminobutyric acid      | C <sub>14</sub> H <sub>15</sub> N <sub>3</sub> O <sub>2</sub>   | 274.1186 | 274 | 171 | 20 | 7.897       | 0.3 | 0.1-200 | 0.9911 |
| 2,4-diaminobutanoic acid   | C <sub>24</sub> H <sub>22</sub> N <sub>6</sub> O <sub>4</sub>   | 230.0924 | 230 | 171 | 10 | 7.984       | 0.8 | 0.3-200 | 0.9985 |
| DL-2,6-Diaminopimelic acid | C <sub>27</sub> H <sub>26</sub> N <sub>6</sub> O <sub>6</sub>   | 266.103  | 266 | 171 | 20 | 8.215/8.343 | 0.9 | 0.3-200 | 0.997  |
| L-Ornithine                | C <sub>25</sub> H <sub>24</sub> N <sub>6</sub> O <sub>4</sub>   | 237.1002 | 237 | 171 | 10 | 8.444       | 0.4 | 0.1-200 | 0.9924 |
| 6-Aminocaproic acid        | C <sub>16</sub> H <sub>19</sub> N <sub>3</sub> O <sub>3</sub>   | 302.1499 | 302 | 171 | 10 | 9.194       | 0.4 | 0.1-200 | 0.9959 |
| L-Norvaline                | C <sub>15</sub> H <sub>17</sub> N <sub>3</sub> O <sub>3</sub>   | 288.1343 | 288 | 171 | 20 | 9.833       | 0.3 | 0.1-200 | 0.9936 |
| D-(–)-α-Phenylglycine      | C <sub>18</sub> H <sub>15</sub> N <sub>3</sub> O <sub>3</sub>   | 322.1186 | 322 | 171 | 20 | 10.375      | 0.6 | 0.2-200 | 0.9981 |
| L-Kynurenine               | C <sub>20</sub> H <sub>18</sub> N <sub>4</sub> O <sub>4</sub>   | 379.1401 | 379 | 171 | 20 | 12.044      | 1.1 | 0.4-100 | 0.9982 |
| L-Norleucine               | C <sub>16</sub> H <sub>19</sub> N <sub>3</sub> O <sub>3</sub>   | 302.1499 | 302 | 171 | 20 | 13.325      | 0.2 | 0.1-100 | 0.9953 |
| (–)-Norepinephrine         | C <sub>18</sub> H <sub>17</sub> N <sub>3</sub> O <sub>4</sub>   | 340.1292 | 340 | 171 | 20 | 7.022       | 0.9 | 0.3-200 | 0.9925 |
| (±)-Octopamine             | C <sub>18</sub> H <sub>17</sub> N <sub>3</sub> O <sub>3</sub>   | 324.1343 | 324 | 171 | 20 | 7.723       | 0.2 | 0.1-200 | 0.9968 |
| Dopamine                   | C <sub>18</sub> H <sub>17</sub> N <sub>3</sub> O <sub>3</sub>   | 324.1343 | 324 | 171 | 20 | 8.473       | 0.4 | 0.1-200 | 0.9955 |
| Tyramine                   | C <sub>18</sub> H <sub>17</sub> N <sub>3</sub> O <sub>2</sub>   | 308.1394 | 308 | 171 | 30 | 9.506       | 0.3 | 0.1-200 | 0.9969 |
| 3-Methoxytyramine          | C <sub>19</sub> H <sub>19</sub> N <sub>3</sub> O <sub>3</sub>   | 338.1499 | 338 | 171 | 30 | 10.141      | 0.2 | 0.1-50  | 0.9924 |
| Tryptamine                 | C <sub>20</sub> H <sub>18</sub> N <sub>4</sub> O                | 331.1553 | 331 | 171 | 20 | 13.375      | 0.7 | 0.2-200 | 0.9968 |
| 4-Aminophenol              | C <sub>16</sub> H <sub>13</sub> N <sub>3</sub> O <sub>2</sub>   | 280.1081 | 280 | 171 | 20 | 8.311       | 0.5 | 0.2-200 | 0.9987 |
| 4-Aminohippuric acid       | C <sub>19</sub> H <sub>16</sub> N <sub>4</sub> O <sub>4</sub>   | 365.1244 | 365 | 171 | 30 | 9.394       | 4.5 | 1.5-200 | 0.9978 |
| 3-Aminobenzoic acid        | C <sub>17</sub> H <sub>13</sub> N <sub>3</sub> O <sub>3</sub>   | 308.103  | 308 | 171 | 20 | 11.803      | 2.5 | 0.8-200 | 0.9903 |
| 3-Aminosalicylic acid      | C <sub>17</sub> H <sub>13</sub> N <sub>3</sub> O <sub>4</sub>   | 324.0979 | 324 | 171 | 20 | 11.910      | 3.6 | 1.2-100 | 0.9909 |
| 4-Aminobenzoic acid        | C <sub>17</sub> H <sub>13</sub> N <sub>3</sub> O <sub>3</sub>   | 308.103  | 308 | 171 | 20 | 11.972      | 0.8 | 0.3-200 | 0.9975 |
| L-Cysteic acid             | C <sub>13</sub> H <sub>13</sub> N <sub>3</sub> O <sub>6</sub> S | 340.0598 | 340 | 171 | 20 | 3.546       | 1.7 | 0.6-200 | 0.9922 |

|                                  |                                                                              |          |     |     |    |               |     |          |        |
|----------------------------------|------------------------------------------------------------------------------|----------|-----|-----|----|---------------|-----|----------|--------|
| Taurine                          | C <sub>12</sub> H <sub>13</sub> N <sub>3</sub> O <sub>4</sub> S              | 296.07   | 296 | 171 | 20 | 4.88          | 1.2 | 0.4-200  | 0.9941 |
| Hypotaurine                      | C <sub>12</sub> H <sub>13</sub> N <sub>3</sub> O <sub>3</sub> S              | 280.075  | 280 | 171 | 20 | 5.015         | 0.5 | 0.2-100  | 0.9974 |
| DL-Methionine sulfone            | C <sub>15</sub> H <sub>17</sub> N <sub>3</sub> O <sub>6</sub> S              | 352.0962 | 352 | 171 | 40 | 5.664         | 0.4 | 0.1-200  | 0.9921 |
| DL-methionine sulfoxide          | C <sub>15</sub> H <sub>17</sub> N <sub>3</sub> O <sub>4</sub> S              | 336.1013 | 336 | 171 | 20 | 5.713         | 0.5 | 0.1-200  | 0.9962 |
| Glutathione disulfide            | C <sub>20</sub> H <sub>23</sub> N <sub>5</sub> O <sub>7</sub> S              | 478.1391 | 478 | 171 | 30 | 6.95          | 0.8 | 0.3-40   | 0.9918 |
| L-Cystine                        | C <sub>13</sub> H <sub>14</sub> N <sub>3</sub> O <sub>3</sub> S              | 292.075  | 292 | 171 | 20 | 7.003         | 0.3 | 0.1-50   | 0.9905 |
| Cystamine                        | C <sub>12</sub> H <sub>13</sub> N <sub>3</sub> OS                            | 248.0852 | 248 | 171 | 20 | 7.329         | 1.3 | 0.4-100  | 0.9954 |
| L-Homocystine                    | C <sub>14</sub> H <sub>15</sub> N <sub>3</sub> O <sub>3</sub> S              | 306.0907 | 306 | 171 | 20 | 8.019         | 0.5 | 0.2-50   | 0.9964 |
| Cystathionine                    | C <sub>27</sub> H <sub>26</sub> N <sub>6</sub> O <sub>6</sub> S              | 282.089  | 282 | 171 | 10 | 9.099         | 1.4 | 0.5-100  | 0.9922 |
| S-(2-Aminoethyl)-L-Cys           | C <sub>25</sub> H <sub>24</sub> N <sub>6</sub> O <sub>4</sub> S              | 253.0863 | 253 | 171 | 10 | 9.127         | 0.5 | 0.2-200  | 0.9986 |
| L-Cysteine                       | C <sub>19</sub> H <sub>20</sub> N <sub>4</sub> O <sub>5</sub> S              | 417.1227 | 417 | 171 | 30 | 9.705         | 0.9 | 0.3-100  | 0.9913 |
| Djenkolic Acid                   | C <sub>27</sub> H <sub>26</sub> N <sub>6</sub> O <sub>6</sub> S <sub>2</sub> | 298.075  | 298 | 171 | 10 | 10.342        | 0.8 | 0.3-200  | 0.9948 |
| Cysteamine                       | C <sub>18</sub> H <sub>20</sub> N <sub>4</sub> O <sub>3</sub> S              | 373.1329 | 373 | 171 | 40 | 10.385        | 0.6 | 0.2-100  | 0.9947 |
| DL-Ethionine                     | C <sub>16</sub> H <sub>19</sub> N <sub>3</sub> O <sub>3</sub> S              | 334.122  | 334 | 171 | 20 | 11.379        | 0.7 | 0.2-100  | 0.9958 |
| DL-Homocysteine                  | C <sub>20</sub> H <sub>22</sub> N <sub>4</sub> O <sub>5</sub> S              | 431.1384 | 431 | 171 | 30 | 10.447/10.804 | 1.7 | 0.6-100  | 0.9947 |
| Glutathione                      | C <sub>26</sub> H <sub>30</sub> N <sub>6</sub> O <sub>9</sub> S              | 603.1868 | 603 | 171 | 40 | 8.891/9.197   | 1.7 | 0.6-100  | 0.9907 |
| L-Carnosine                      | C <sub>19</sub> H <sub>20</sub> N <sub>6</sub> O <sub>4</sub>                | 397.1619 | 397 | 171 | 40 | 5.113         | 6.8 | 2.3-200  | 0.995  |
| Ala-leu                          | C <sub>19</sub> H <sub>24</sub> N <sub>4</sub> O <sub>4</sub>                | 373.187  | 373 | 171 | 30 | 11.725        | 0.1 | 0.03-200 | 0.9919 |
| Ala-Trp                          | C <sub>24</sub> H <sub>23</sub> N <sub>5</sub> O <sub>4</sub>                | 446.1823 | 446 | 171 | 30 | 11.992        | 0.3 | 0.1-50   | 0.9962 |
| <i>trans</i> -4-Hydroxy-L-Pro    | C <sub>15</sub> H <sub>15</sub> N <sub>3</sub> O <sub>4</sub>                | 302.1135 | 302 | 171 | 20 | 3.192         | 0.4 | 0.1-200  | 0.9993 |
| <i>O</i> -Phosphorylethanolamine | C <sub>12</sub> H <sub>14</sub> N <sub>3</sub> O <sub>5</sub> P              | 312.0744 | 312 | 171 | 20 | 4.027         | 0.7 | 0.2-200  | 0.9927 |
| Sarcosine                        | C <sub>13</sub> H <sub>13</sub> N <sub>3</sub> O <sub>3</sub>                | 260.103  | 260 | 171 | 20 | 4.5           | 0.5 | 0.2-200  | 0.9948 |
| 3-Methyl-L-histidine             | C <sub>17</sub> H <sub>17</sub> N <sub>5</sub> O <sub>3</sub>                | 340.1404 | 340 | 171 | 20 | 4.627         | 2   | 0.7-100  | 0.9966 |
| 1-Methyl-L-histidine             | C <sub>17</sub> H <sub>17</sub> N <sub>5</sub> O <sub>3</sub>                | 340.1404 | 340 | 171 | 20 | 5.028         | 3.8 | 1.3-100  | 0.9911 |
| ADMA                             | C <sub>18</sub> H <sub>24</sub> N <sub>6</sub> O <sub>3</sub>                | 373.1983 | 373 | 171 | 30 | 6.343         | 12  | 4.0-50   | 0.9945 |
| <i>o</i> -acetyl-L-serine        | C <sub>15</sub> H <sub>15</sub> N <sub>3</sub> O <sub>5</sub>                | 318.1084 | 318 | 171 | 20 | 7.052         | 0.4 | 0.1-200  | 0.9935 |

|                             |                                                                |          |     |     |    |        |     |          |        |
|-----------------------------|----------------------------------------------------------------|----------|-----|-----|----|--------|-----|----------|--------|
| N $\alpha$ -Acetyl-L-lysine | C <sub>18</sub> H <sub>22</sub> N <sub>4</sub> O <sub>4</sub>  | 359.1714 | 359 | 171 | 40 | 7.692  | 0.3 | 0.1-200  | 0.9937 |
| DL-5-Hydroxylysine          | C <sub>26</sub> H <sub>26</sub> N <sub>6</sub> O <sub>5</sub>  | 252.1055 | 252 | 171 | 10 | 8.1    | 0.3 | 0.1-100  | 0.9984 |
| 5-Hydroxy-L-tryptophan      | C <sub>21</sub> H <sub>18</sub> N <sub>4</sub> O <sub>4</sub>  | 391.1401 | 391 | 171 | 20 | 8.175  | 0.3 | 0.1-200  | 0.9985 |
| 4-Hydroxy-L-isoleucine      | C <sub>16</sub> H <sub>19</sub> N <sub>3</sub> O <sub>4</sub>  | 318.1448 | 318 | 171 | 20 | 8.527  | 1.8 | 0.6-50   | 0.9955 |
| Ethanolamine                | C <sub>12</sub> H <sub>13</sub> N <sub>3</sub> O <sub>2</sub>  | 232.1081 | 232 | 171 | 20 | 5.16   | 0.1 | 0.04-200 | 0.9945 |
| Methylamine                 | C <sub>11</sub> H <sub>11</sub> N <sub>3</sub> O               | 202.0975 | 202 | 171 | 40 | 5.183  | 0.2 | 0.1-200  | 0.9926 |
| Agmatine                    | C <sub>15</sub> H <sub>20</sub> N <sub>6</sub> O               | 301.1771 | 301 | 171 | 20 | 5.764  | 0.9 | 0.3-200  | 0.9947 |
| Ethylamine                  | C <sub>12</sub> H <sub>13</sub> N <sub>3</sub> O               | 216.1131 | 216 | 171 | 20 | 6.687  | 0.3 | 0.1-200  | 0.9937 |
| Putrescine                  | C <sub>24</sub> H <sub>24</sub> N <sub>6</sub> O <sub>2</sub>  | 215.1053 | 215 | 171 | 20 | 9.12   | 0.4 | 0.1-200  | 0.9971 |
| Cadaverine                  | C <sub>25</sub> H <sub>26</sub> N <sub>6</sub> O <sub>2</sub>  | 222.1131 | 222 | 171 | 10 | 10.395 | 0.3 | 0.1-200  | 0.9906 |
| Spermine                    | C <sub>50</sub> H <sub>50</sub> N <sub>12</sub> O <sub>4</sub> | 442.2112 | 442 | 171 | 30 | 13.323 | 2.3 | 0.8-200  | 0.9927 |
| Prolinamide                 | C <sub>15</sub> H <sub>16</sub> N <sub>4</sub> O <sub>2</sub>  | 285.1346 | 285 | 171 | 20 | 5.571  | 0.2 | 0.1-200  | 0.9935 |
| Allantoin                   | C <sub>14</sub> H <sub>12</sub> N <sub>6</sub> O <sub>4</sub>  | 329.0993 | 329 | 171 | 20 | 6.63   | 3.8 | 1.3-100  | 0.9938 |
| 5-Hydroxydopamine           | C <sub>18</sub> H <sub>17</sub> N <sub>3</sub> O <sub>4</sub>  | 340.1292 | 340 | 171 | 20 | 7.168  | 1   | 0.3-50   | 0.9929 |
| 3,4-dihydroxy-DL-Phe        | C <sub>19</sub> H <sub>17</sub> N <sub>3</sub> O <sub>5</sub>  | 368.1241 | 368 | 171 | 20 | 7.891  | 0.8 | 0.3-200  | 0.998  |
| DL-Normetanephrine          | C <sub>19</sub> H <sub>19</sub> N <sub>3</sub> O <sub>4</sub>  | 354.1448 | 354 | 171 | 30 | 8.174  | 0.5 | 0.2-100  | 0.9971 |
| 1,3-Diaminopropane          | C <sub>23</sub> H <sub>22</sub> N <sub>6</sub> O <sub>2</sub>  | 208.0975 | 208 | 171 | 10 | 8.528  | 0.4 | 0.1-200  | 0.9986 |
| 1,2-Diaminopropane          | C <sub>23</sub> H <sub>22</sub> N <sub>6</sub> O <sub>2</sub>  | 208.0975 | 208 | 171 | 10 | 8.911  | 0.3 | 0.1-200  | 0.994  |
| L-Tryptophanamide           | C <sub>21</sub> H <sub>19</sub> N <sub>5</sub> O <sub>2</sub>  | 374.1612 | 374 | 171 | 30 | 10.856 | 0.5 | 0.2-100  | 0.993  |
